## Validation of the Zwolle score for selection of very low-risk STEMI patients treated with primary angioplasty

A. Cordero<sup>1</sup>, B. Cid<sup>2</sup>, P. Monteiro<sup>3</sup>, J.M. Garcia-Acuna<sup>2</sup>, M. Rodriguez-Manero<sup>2</sup>, R. Trillo Noche<sup>2</sup>, D. Lopez Otero<sup>2</sup>, J.C. Sanmartin Pena<sup>2</sup>, V. Bertomeu-Gonzalez<sup>1</sup>, D. Escribano<sup>1</sup>, F. Goncalves<sup>3</sup>, L. Goncalves<sup>3</sup>, P. Zuazola<sup>2</sup>, J.R. Gonzalez-Juanatey<sup>2</sup>

<sup>1</sup> University Hospital of San Juan, Alicante, Spain; <sup>2</sup> University Hospital of Santiago de Compostela, Cardiology, Santiago de Compostela, Spain;

<sup>3</sup> University Hospitals of Coimbra, Cardiology, Coimbra, Portugal

**Funding Acknowledgement:** Type of funding source: None

**Background:** The Zwolle risk score was designed to stratify the actual in-hospital mortality risk of ST-elevation myocardial infarction (STEMI) patients treated with primary percutaneous coronary intervention (p-PCI) but, also, for decision-making related to patients location in an intensive care unit or not. Since the GRACE score continues being the gold-standard for individual risk assessment in STEMI in most institutions we assessed the specificity of both scores for in-hospital mortality.

**Methods:** We assessed the accuracy of Zwolle risk score for in-hospital mortality estimation as compared to the GRACE score in all patients admitted for STEMI in 3 tertiary hospitals. Patients with Zwolle risk score <3 would qualify as "low risk", 3–5 as "intermediate risk" and ≥6 as "high risk". Patients with GRACE score <140 were classified as low-risk. Specificity, sensitivity and classification were assessed by ROC curves and the area under the curve (AUC).

**Results:** We included 4,446 patients, mean age 64.7 (13.6) years, 24% women and 39% with diabetes. Mean GRACE score was 157.3 (4.9)

and Zwolle was 2.8 (3.3). In-hospital mortality was 10.6% (471 patients). Patients who died had higher GRACE score ( $218.4 \pm 4.9$  vs.  $149.6 \pm 37.5$ ;  $p < 0.001$ ) and Zwolle score ( $7.6 \pm 4.3$  vs.  $2.3 \pm 2.18$ ;  $p < 0.001$ ); a statistically significant increase of in-hospital mortality risk, adjusted by age, gender and revascularization, was observed with both scores (figure). A total of 1,629 patients (40.0%) were classified as low risk by the GRACE score and 2,962 (66.6%) by the Zwolle score; in-hospital mortality was 1.6% and 2.7%, respectively. Moreover, there was a significant increase of in-hospital mortality rate according to Zwolle categories (2.7%; 13.0%; 41.6%). The AUC of both score was the same ( $p = 0.49$ ) but the specificity of GRACE score <140 was 43.1% as compared to 72.6% obtained by Zwolle score <3; patients accurately classified was also lower with the GRACE score threshold (48.8% vs. 73.7%).

**Conclusions:** Selection of low-risk STEMI patients treated with p-PCI based on the Zwolle risk score has higher specificity than the GRACE score and might be useful for the care organization in clinical practice.

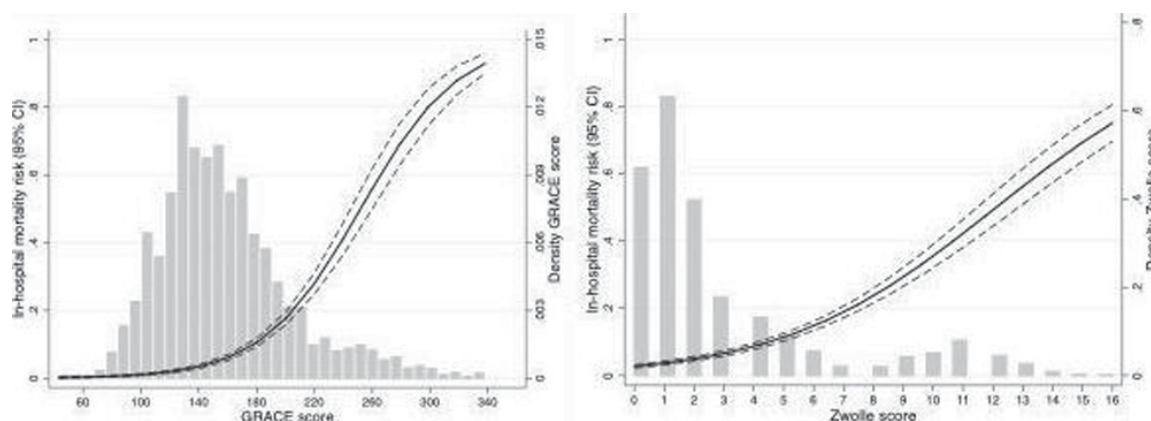

Source: http://academic.oup.com/eurheartj/article-pdf/41/Supplement_2/ehaa946.1840/34520282/ehaa946.1840.pdf
